# Supplementary material for: Unique organogel formation with a channel-type cyclodextrin assembly
Source: Royal Society of Chemistry journal article supplement (doi:10.1039/b907491k), 2009-01-01
Supplement: b907491k.pdf [file b907491k.pdf]

## Supplementary Information

# Unique organogel formation with a channel-type cyclodextrin assembly

Toshiyuki Kida,<sup>a</sup> Yasuhiro Marui,<sup>a</sup> Kazuhiro Miyawaki,<sup>b</sup> Eiichi Kato<sup>b</sup>  
and Mitsuru Akashi\*<sup>a</sup>

<sup>a</sup>*Department of Applied Chemistry, Graduate School of Engineering, Osaka University*

*2-1 Yamada-oka, Suita, Osaka 565-0871, Japan*

<sup>b</sup>*NEOS Company Limited, 1-1 Oike-cho, Konan, Shiga 520-3213, Japan*

### Contents

1. Photographs of organogels formed by a channel-type  $\gamma$ -cyclodextrin assembly
2. Rheological properties of organogels formed by a channel-type  $\gamma$ -cyclodextrin assembly
3. XRD patterns of a channel-type  $\gamma$ -cyclodextrin assembly and xerogels prepared from the organogels

### 1. Photographs of organogels formed by a channel-type $\gamma$ -cyclodextrin assembly

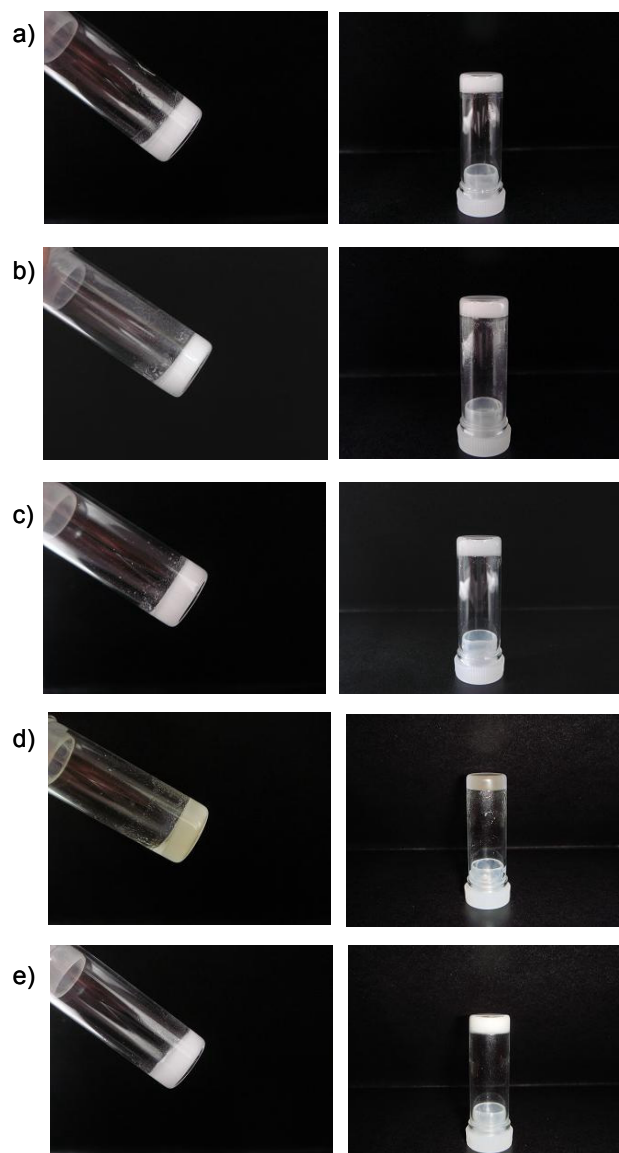

**Fig. S1** Photographs of organogels formed by the channel-type  $\gamma$ -cyclodextrin assembly (100 mg) in organic solvents. (a) Tetradecane (200  $\mu$ L). (b) Hexane (200  $\mu$ L). (c) Cyclohexane (200  $\mu$ L). (d) Benzene (200  $\mu$ L). (e) 1,4-Dioxane (150  $\mu$ L).

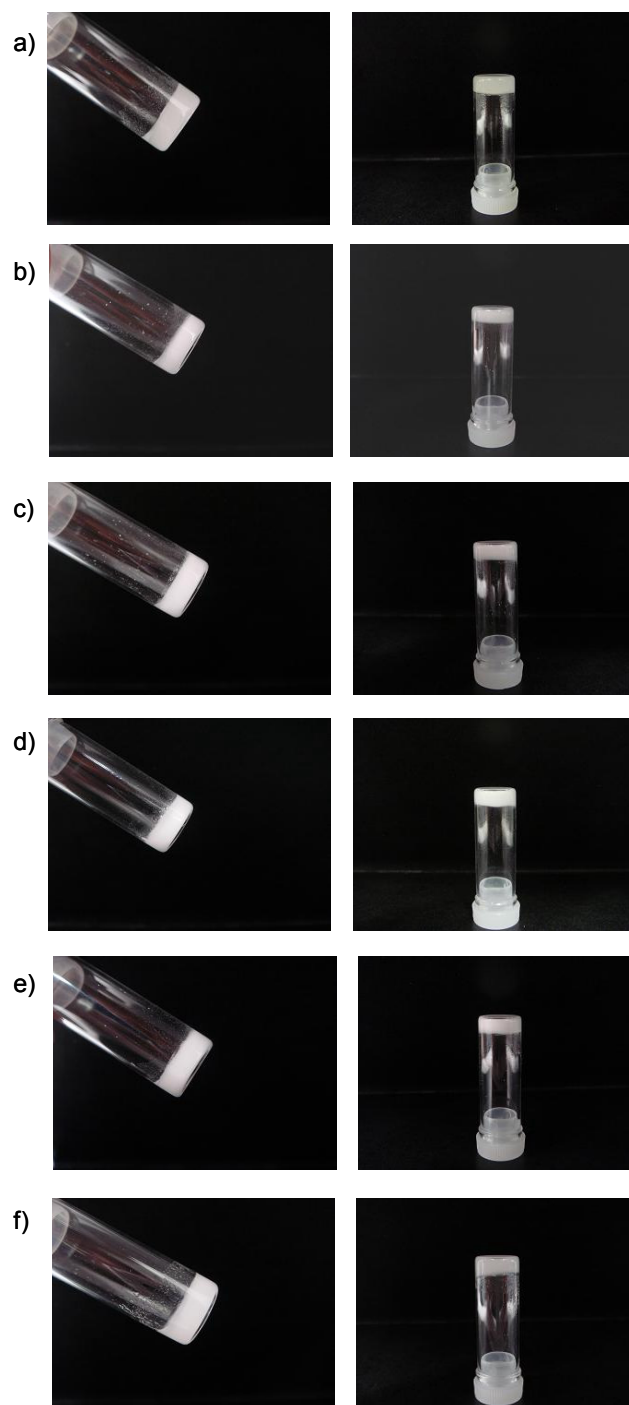

**Fig. S2** Photographs of organogels formed by the channel-type  $\gamma$ -CD assembly (100 mg) in organic solvents or oil. (a) Toluene (150  $\mu$ L). (b) Chloroform (150  $\mu$ L). (c) Ethyl acetate (150  $\mu$ L). (d) Ethanol (120  $\mu$ L). (e) Acetonitrile (150  $\mu$ L). (f) Soybean oil (150  $\mu$ L).

## 2. Rheological properties of organogels formed by a channel-type $\gamma$ -cyclodextrin assembly

The oscillatory shear measurements were carried out using a stress-controlled rheometer (HAAKE Rheostress RS 1) with a parallel plate-type geometry (plate diameter 20 mm, plate height 1 mm). The storage modulus  $G'$  and the loss modulus  $G''$  were measured at a stress of 10 Pa as a function of the angular frequency from 0.1 to 10  $\text{rad s}^{-1}$  at 20 °C.

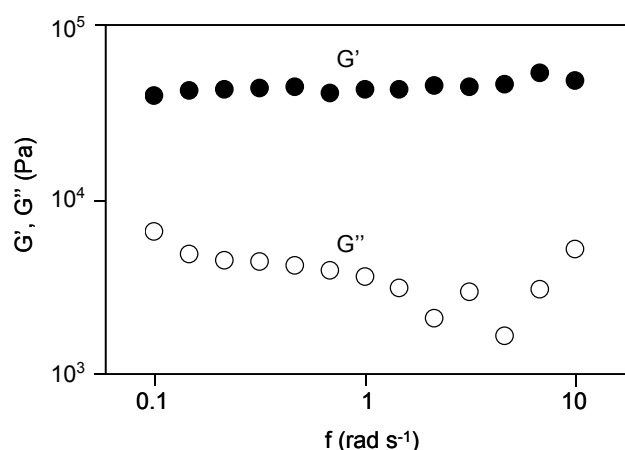

**Fig. S3** Rheological properties of a tetradecane gel formed by the channel-type  $\gamma$ -CD assembly at 20 °C.  $G'$ : Storage modulus.  $G''$ : Loss modulus. The gel was formed by mixing a channel-type  $\gamma$ -CD assembly (400 mg) with tetradecane (1 mL).

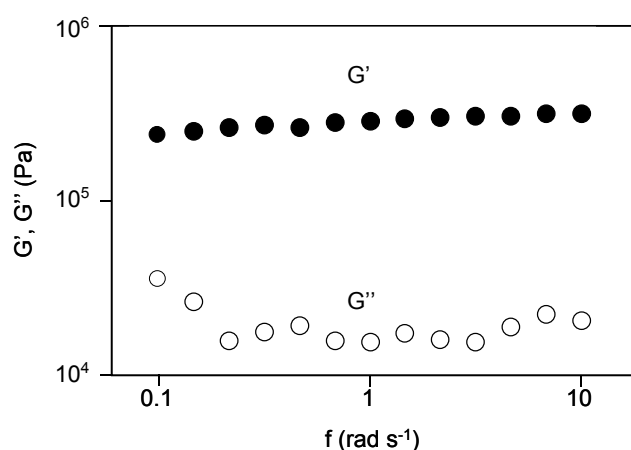

**Fig. S4** Rheological properties of a soybean oil gel formed by the channel-type  $\gamma$ -CD assembly at 20 °C.  $G'$ : Storage modulus.  $G''$ : Loss modulus. The gel was formed by mixing a channel-type  $\gamma$ -CD assembly (600 mg) with soybean oil (1 mL).

### 3. XRD patterns of a channel-type $\gamma$ -cyclodextrin assembly and xerogels prepared from the organogels

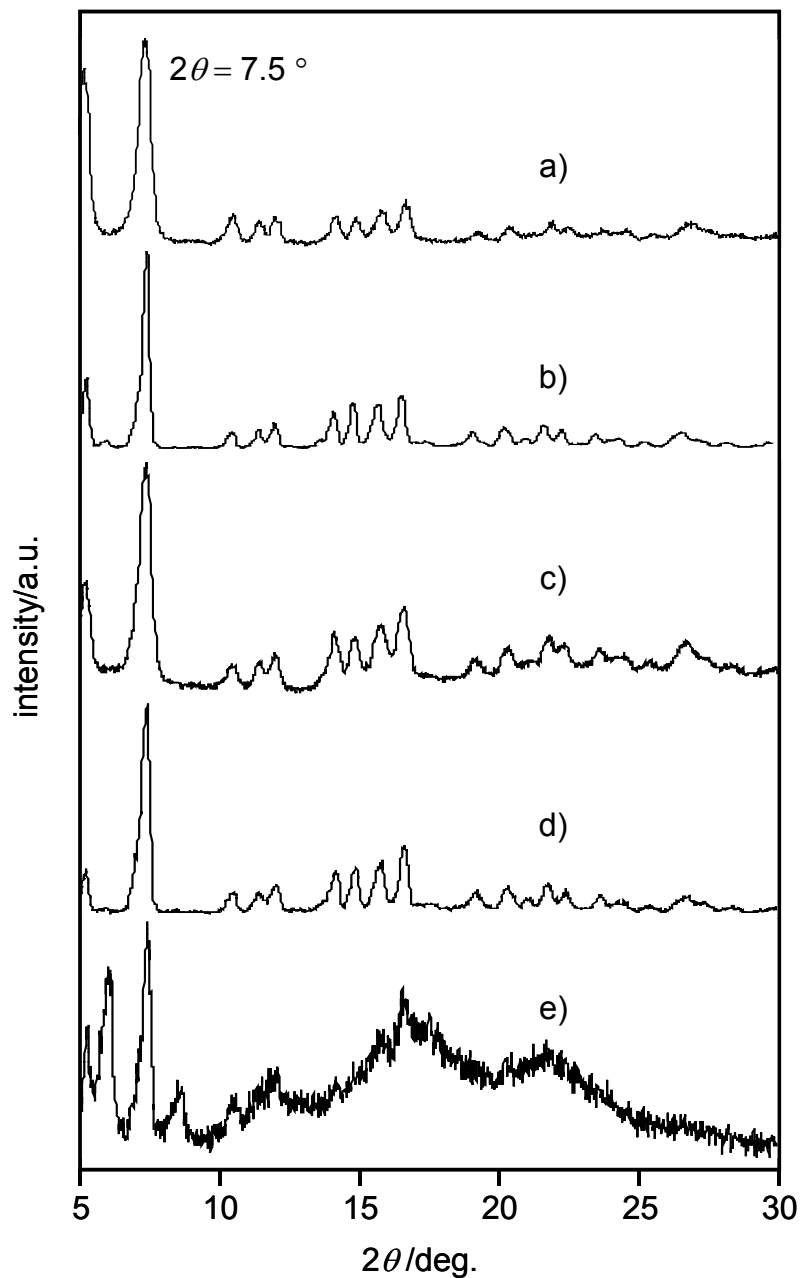

**Fig. S5** XRD patterns of the channel-type  $\gamma$ -CD assembly (a) and xerogels (b-e) prepared from the organogels with channel-type  $\gamma$ -CD assembly. (b) Cyclohexane gel. (c) Benzene gel. (d) 1,4-Dioxane gel. (e) Ethanol gel.
